# Supplementary material for: Bariatric Surgery Affects Plasma Levels of Alanine Aminotransferase Independent of Weight Loss: A Registry-Based Study
Source: MDPI journal article supplement (doi:10.3390/jcm10122724), 2021-06-20
Supplement: s1 [file s1]

# Bariatric surgery affects plasma levels of alanine aminotransferase independent of weight-loss: a registry-based study

Shira Azulai <sup>1</sup>, Ronit Grinbaum <sup>2</sup>, Nahum Beglaibter <sup>2</sup>, Shai Meron Eldar <sup>3,4</sup>, Moshe Rubin <sup>4,5</sup>, Shai Carmi <sup>6</sup>, Rachel Ben-Haroush Schyr <sup>1</sup>, Orly Romano-Zelekha <sup>7</sup> and Danny Ben-Zvi <sup>1,\*</sup>.

<sup>1</sup> Dept. of Developmental Biology and Cancer Research, Institute for Medical Research Israel-Canada, The Hebrew University of Jerusalem-Hadassah medical school, Jerusalem, Israel; shira.azulai@gmail.com; Rachel.schyr@mail.huji.ac.il

<sup>2</sup> Dept. of Surgery, Hadassah-Hebrew University Medical Center, Mount Scopus, Jerusalem, Israel; ronitgr@hadassah.org.il; bnahum@hadassah.org.il

<sup>3</sup> Bariatric Surgery Unit, Division of General Surgery, Tel Aviv Sourasky Medical Center, Tel-Aviv, Israel; shaieldar@gmail.com

<sup>4</sup> Israel Sackler Faculty of Medicine, Tel-Aviv University, Tel-Aviv, Israel

<sup>5</sup> Dept. of Surgery, Tel HaShomer Medical Center, Ramat Gan, Israel, Israel; moshe.rubin2@sheba.health.gov.il

<sup>6</sup> Braun School of Public Health and Community Medicine, The Hebrew University of Jerusalem-Hadassah medical school, Jerusalem, Israel; shai.carmi@mail.huji.ac.il

<sup>7</sup> Israel Center for Disease Control, Ministry of Health, Ramat Gan, Israel; orly.romano@moh.gov.il

\* Correspondence: danny.ben-zvi@mail.huji.ac.il

## Supplementary Information

|                                                 | <b>SG (n=1073 )</b> | <b>RYGB (n=168 )</b>  | <b>OAGB (n=94)</b>   |
|-------------------------------------------------|---------------------|-----------------------|----------------------|
| ALT pre-surgery [IU/L]                          | 26 [19-39]          | 24 [18-36]            | 25.5 [20-33.75]      |
| ALT post-surgery [IU/L]*                        | 17 [13-22]          | 21 [16-28]            | 21.5 [17-28]         |
| Patients with abnormal ALT levels pre-surgery   | 459 (43%)           | 65 (39%)              | 36 (38%)             |
| Patients with abnormal ALT levels post-surgery* | 110 (10%)           | 43 (26%)              | 23 (24%)             |
| AST pre-surgery [IU/L]                          | 23 [18-30]          | 23 [18.75-30.25]      | 23 [19-28]           |
| AST post-surgery [IU/L]*                        | 18 [15-22]          | 23 [18.75-29]         | 23 [18-28]           |
| A1C pre-surgery [%]*                            | 6.5 [5.8-7.6]       | 7.2 [6.1-8.7]         | 6.3 [6-7.68]         |
| A1C post-surgery [%]*                           | 5.6 [5.3-6]         | 5.7 [5.4-6.4]         | 5.4 [5-5.7]          |
| BMI pre-surgery [kg/m <sup>2</sup> ]            | 41.34 [38.57-44.6]  | 40.15 [37.58-43.96]   | 41.2 [38.06-43.86]   |
| BMI post-surgery [kg/m <sup>2</sup> ]*          | 30.07 [26.77-33.24] | 28.33 [25.67-31.27]   | 27.2 [24.92-30.12]   |
| EWL [%]*                                        | 69.81[53.2-88.04]   | 77.62 [60.74-95.13]   | 83.95 [69.84-100.53] |
| TG pre-surgery [mg/dL]                          | 157 [115-215.8]     | 156.5 [114.25-221.75] | 152.75 [101.93-212]  |
| Age [years]*                                    | 51.29 [41.08-58.41] | 55.37 [46.44-60.72]   | 52.67 [43.94-59.77]  |
| Female sex                                      | 672 (63%)           | 101 (60%)             | 57 (61%)             |
| Jewish ethnicity                                | 909 (85%)           | 144 (86%)             | 85 (90%)             |
| Smoking                                         | 178 (17%)           | 25 (15%)              | 14 (15%)             |
| Hypertension*                                   | 539 (50%)           | 108 (64%)             | 52 (55%)             |
| Alcohol Consumption*                            | 16 (1%)             | 9 (0.5%)              | 0 (0%)               |

**Table S1:** pre- and two-year post-surgery outcomes for the three surgery types in the study population. BMI: body mass index; A1C: glycated hemoglobin; TG: triglycerides. SG: sleeve gastrectomy; RYGB: Roux en Y Gastric Bypass; OAGB: one anastomosis gastric bypass. p-values derived using Kruskal-Wallis H-tests for continuous variables and using  $\chi^2$  test for categorical variables. Bonferroni correction was used to correct for multiple hypothesis testing. \*p-value<0.05 in all three surgery types.

|                                               | <b>All cohort<br/>(n=19403)</b> | <b>population characteristics<br/>(n=1335)</b> |
|-----------------------------------------------|---------------------------------|------------------------------------------------|
| ALT pre-surgery [IU/L]                        | 26 [18-38]                      | 26 [19-38]                                     |
| AST pre-surgery [IU/L]                        | 22 [18-29]                      | 23 [18-30]                                     |
| A1C pre-surgery [%]*                          | 5.8 [5.4-6.3]                   | 6.5 [5.9-7.7]                                  |
| BMI pre-surgery [kg/m <sup>2</sup> ]          | 41.23 [38.83-44.52]             | 41.21 [38.39-44.55]                            |
| TG pre-surgery [mg/dL]*                       | 144 [106-200]                   | 156 [114-216]                                  |
| Patients with abnormal ALT levels pre-surgery | 8327 (43%)                      | 560 (42%)                                      |
| Hypertension*                                 | 6057 (31%)                      | 699 (52%)                                      |
| smokers                                       | 4146 (21%)                      | 217 (16%)                                      |
| Alcohol consumption                           | 499 (3%)                        | 25 (2%)                                        |
| Age [years]*                                  | 42.2 [32.2-51.8]                | 51.7 [41.9-58.9]                               |
| Sex – female*                                 | 12903 (67%)                     | 830 (62%)                                      |
| Ethnicity – Jewish*                           | 15850 (82%)                     | 1138 (85%)                                     |
| Surgery type*                                 | SG: 14880 (77%)                 | 1073 (80%)                                     |
|                                               | RYGB: 1661 (8%)                 | RYGB: 168 (13%)                                |
|                                               | OAGB: 2862 (15)                 | OAGB: 94 (7%)                                  |

**Table S2:** Pre-surgery parameters of patients from the registry and from study population. ALT: alanine aminotransferase; AST: aspartate aminotransferase; BMI: body mass index; A1C: glycated hemoglobin; TG: triglycerides; SG: sleeve gastrectomy; RYGB: Roux en Y gastric bypass; OAGB: one anastomosis gastric bypass.

p-values derived using Mann-Whitney U-test for continuous variables and using  $\chi^2$  test for categorical variables. \* p value<0.05

|                    | <b><math>\beta</math></b> | <b>SE <math>\beta</math></b> | <b>p value</b> | <b>CI</b>      |
|--------------------|---------------------------|------------------------------|----------------|----------------|
| <b>Constant</b>    | -11.83                    | 2.17                         | <1e-5          | [-16.07 -7.58] |
| <b>AST [IU/L]</b>  | 0.89                      | 0.04                         | <1e-5          | [0.82 0.95]    |
| <b>Age [years]</b> | -0.1                      | 0.04                         | <0.001         | [-0.18 -0.03]  |
| <b>RYGB vs SG</b>  | -5.45                     | 1.42                         | <1e-5          | [-8.23 -2.67]  |
| <b>OAGB vs SG</b>  | -5.72                     | 1.83                         | <0.001         | [-9.31 -2.13]  |

Table S3: Backwards elimination multivariate linear regression, predicting change in AST.  $\beta$ : Coefficient, SE: Standard Error, OR: Odds Ratio, CI: Confidence Interval, NA: not applicable, SG: sleeve gastrectomy. RYGB: Roux en Y gastric bypass. OAGB: one anastomosis gastric bypass. ALT: alanine aminotransferase. N=1355.  $R^2=0.34$ .

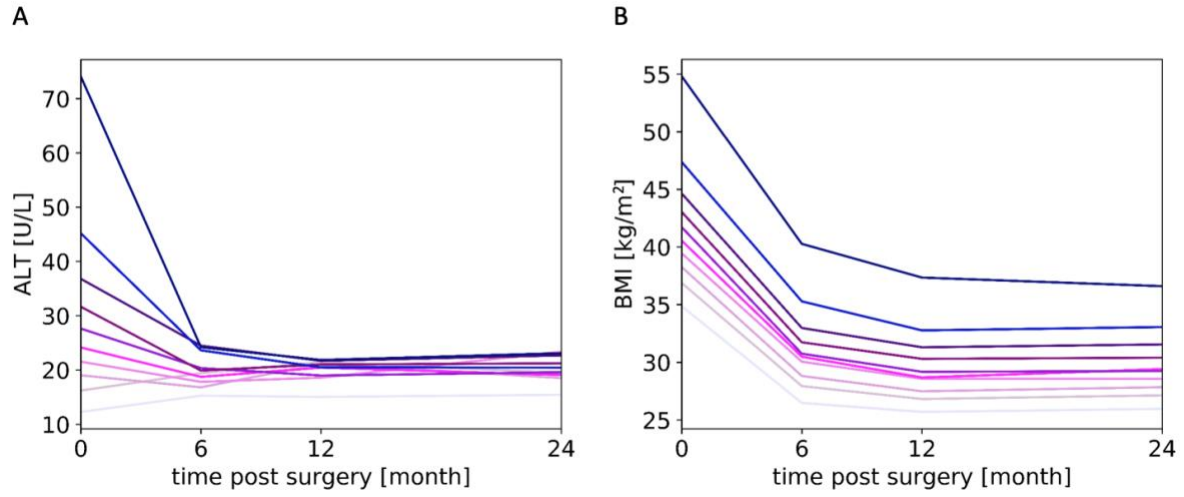

Figure S1: The mean ALT (A) and BMI (B) values of each decile in the study population where this data was available, according to the patients' pre-operative values. Highest decile in dark purple, middle decile in shades of pink and bottom decile in light purple. n=887. BMI: body mass index; ALT alanine aminotransferase.
